# Supplementary material
Source: PubMed Central journal article supplement (PMC4790871)

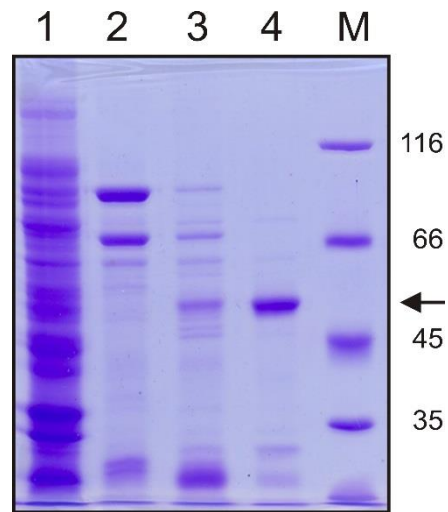

**Supplemental Figure 1.** Purification of Recombinant ACT.

Polyacrylamide gel of cell lysate (lane 1), and elution fractions with increasing imidazole concentrations (lanes 2-4) and size marker (M).

The arrow marks the position of the purified ACT protein of ~51 kD.

A

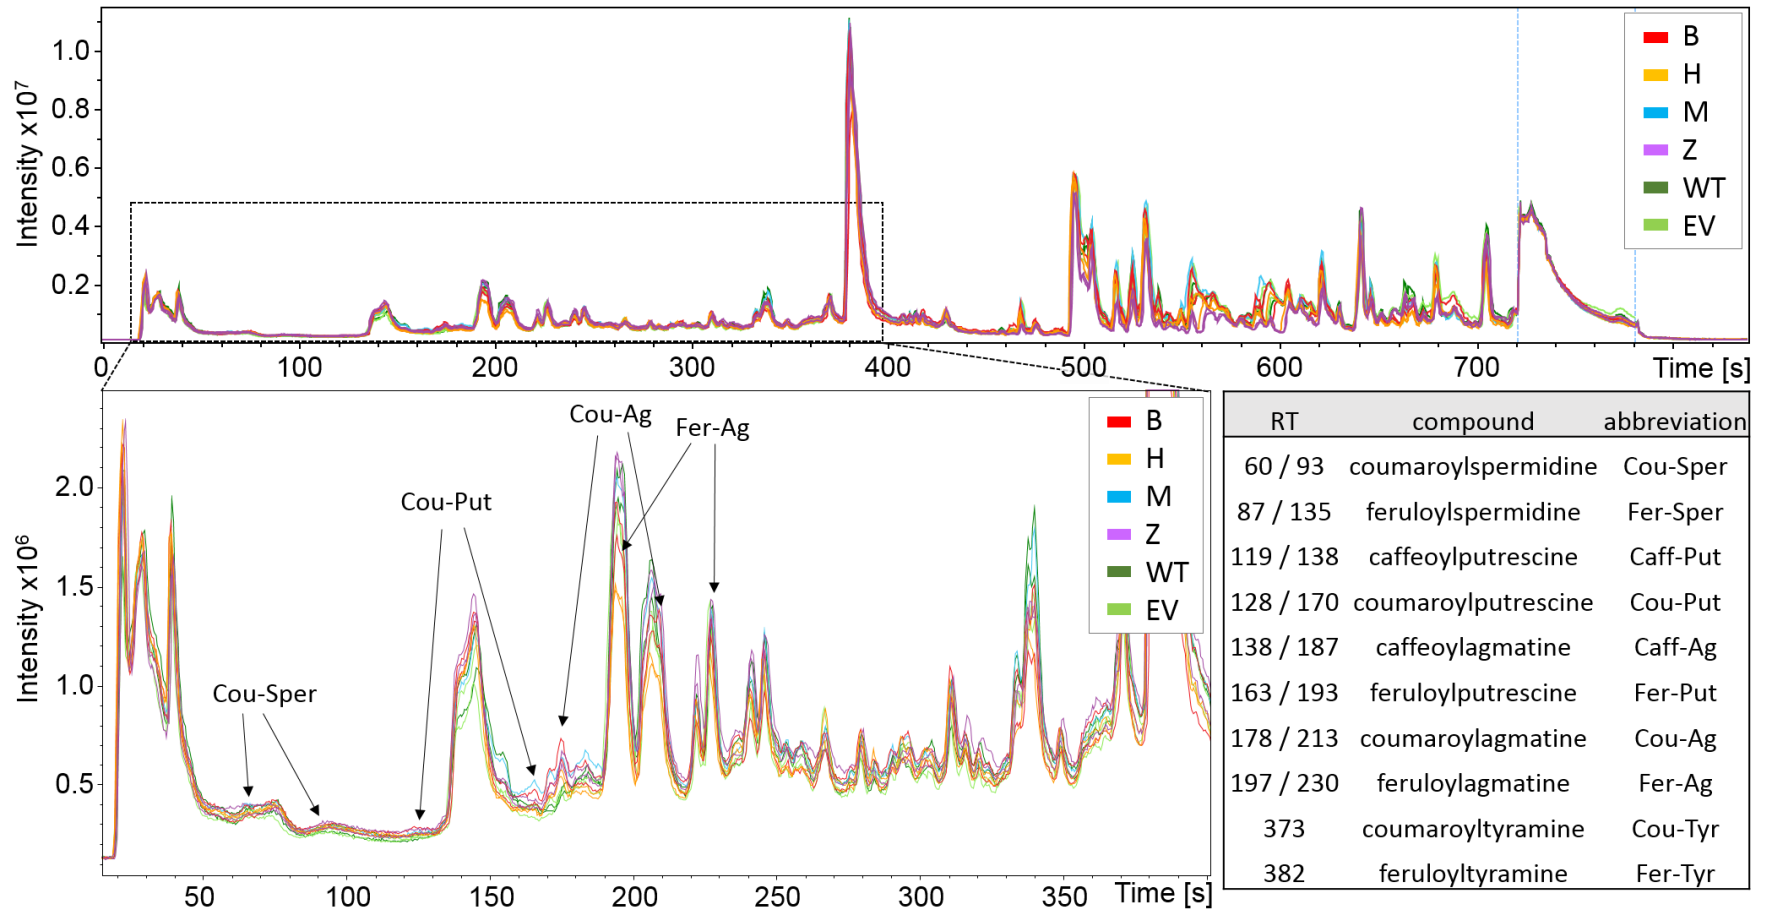

**B**

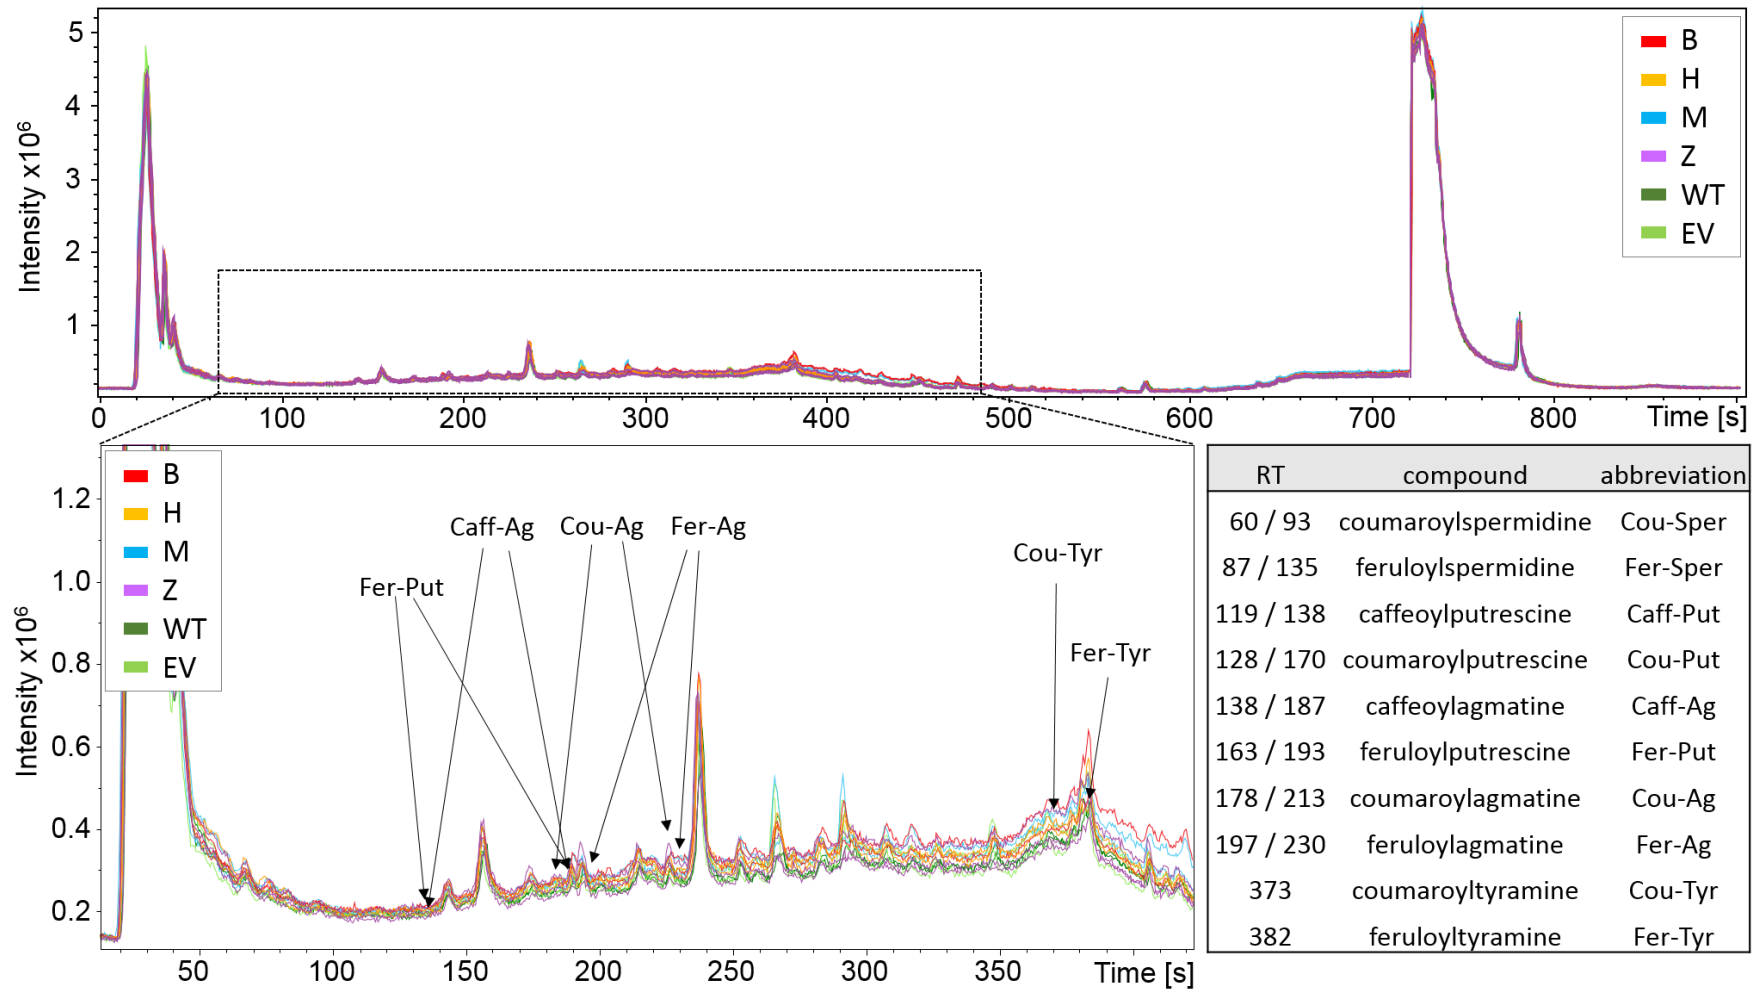

C

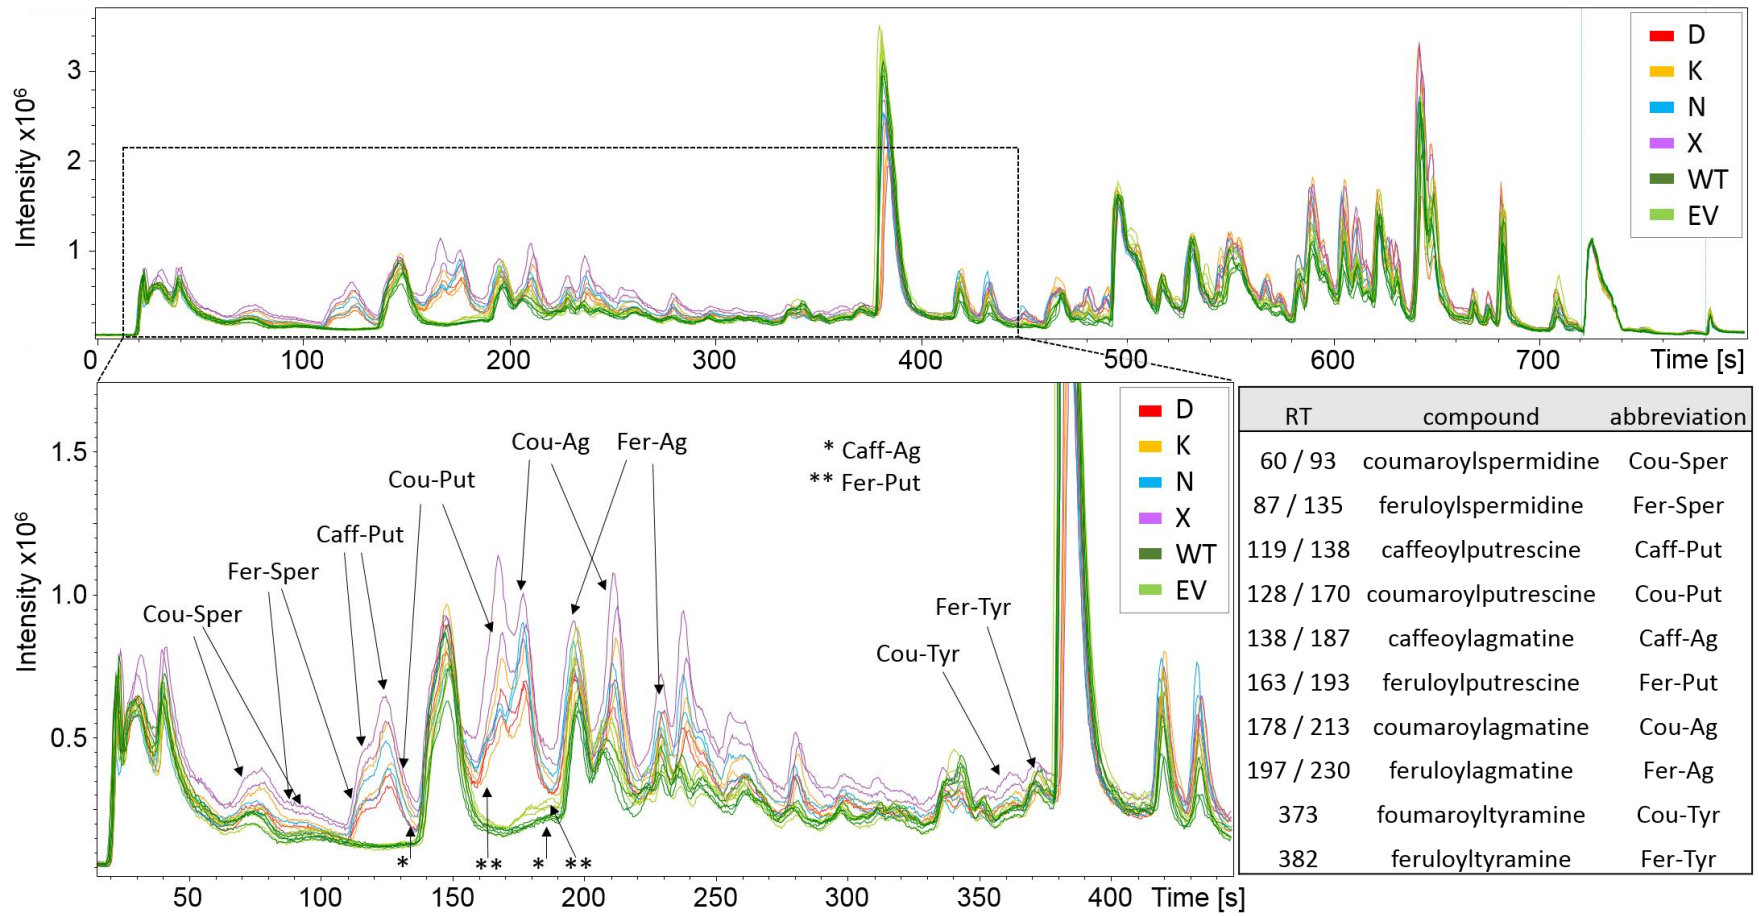

D

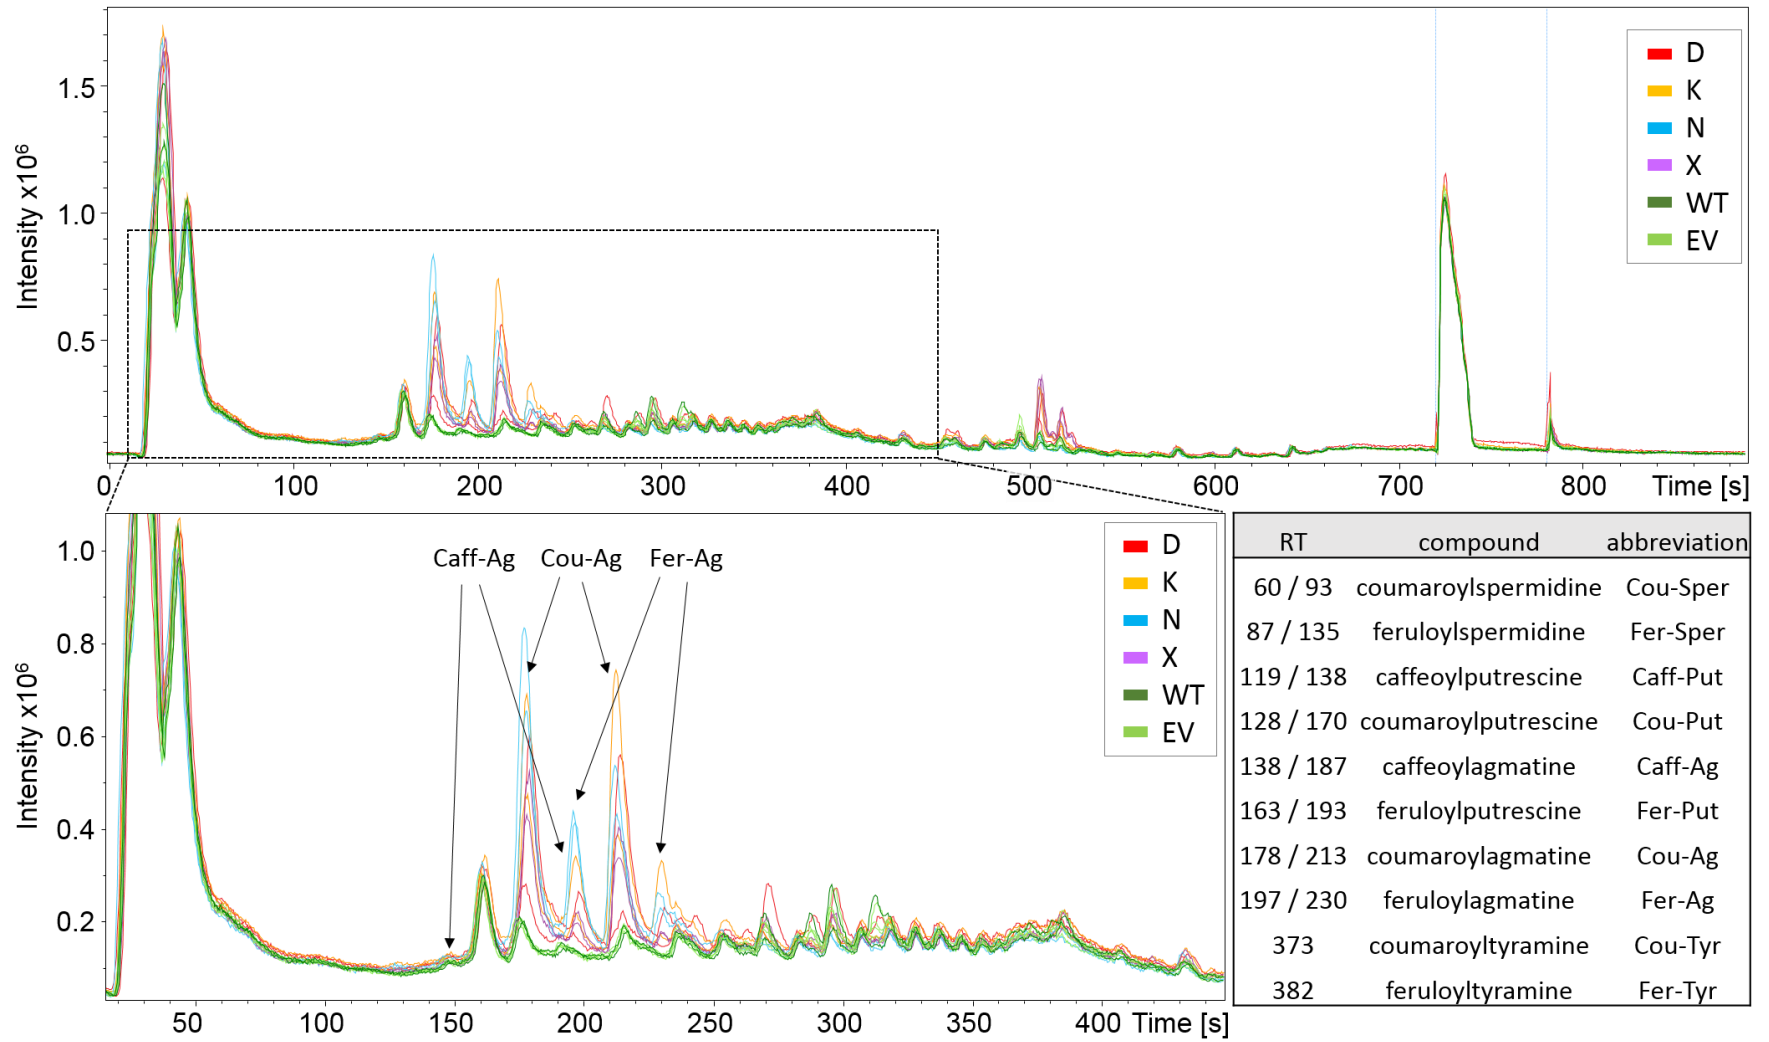

**E**

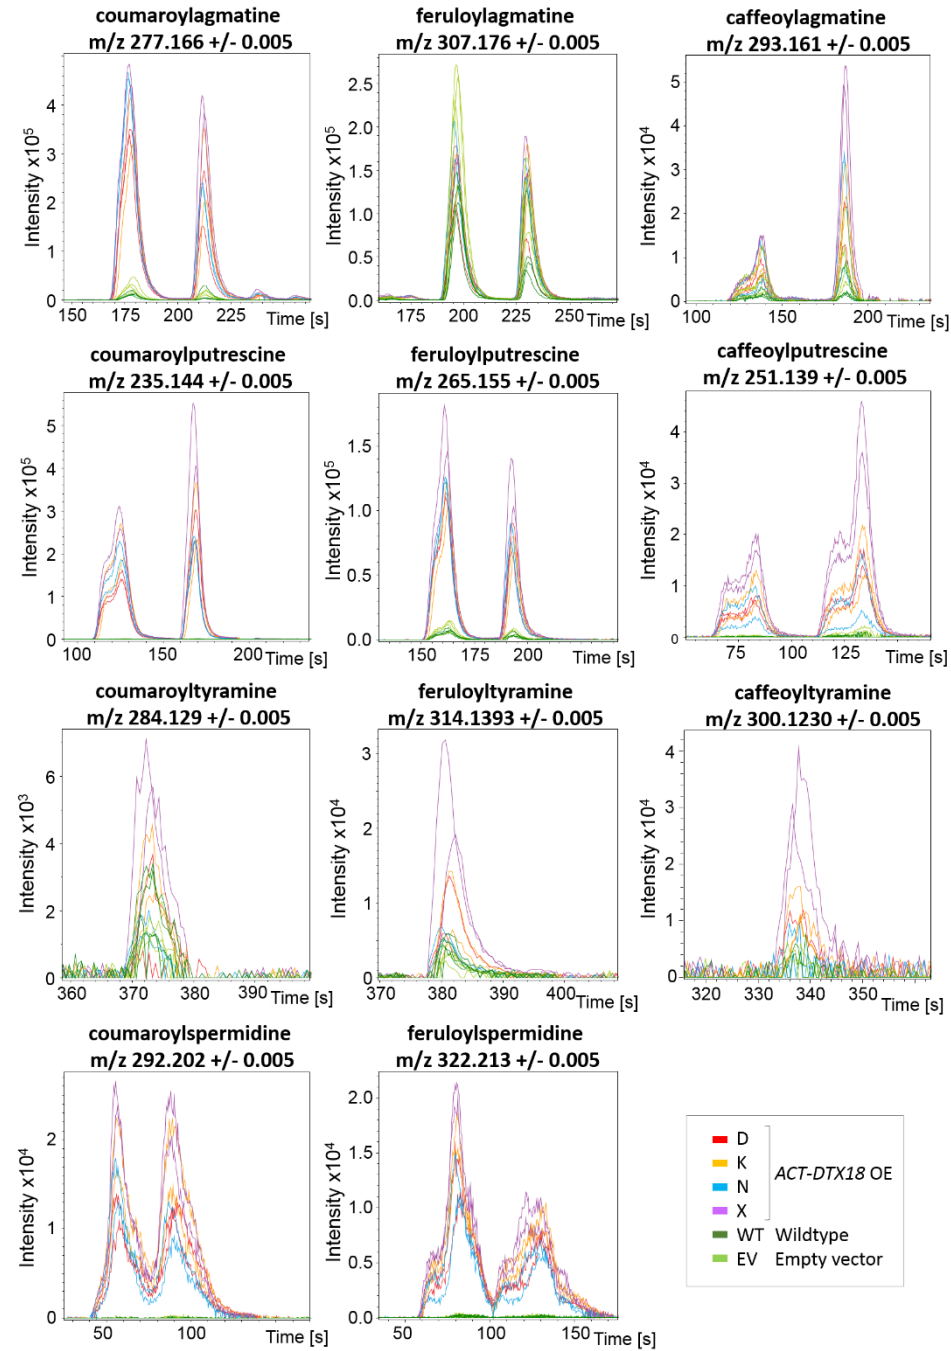

F

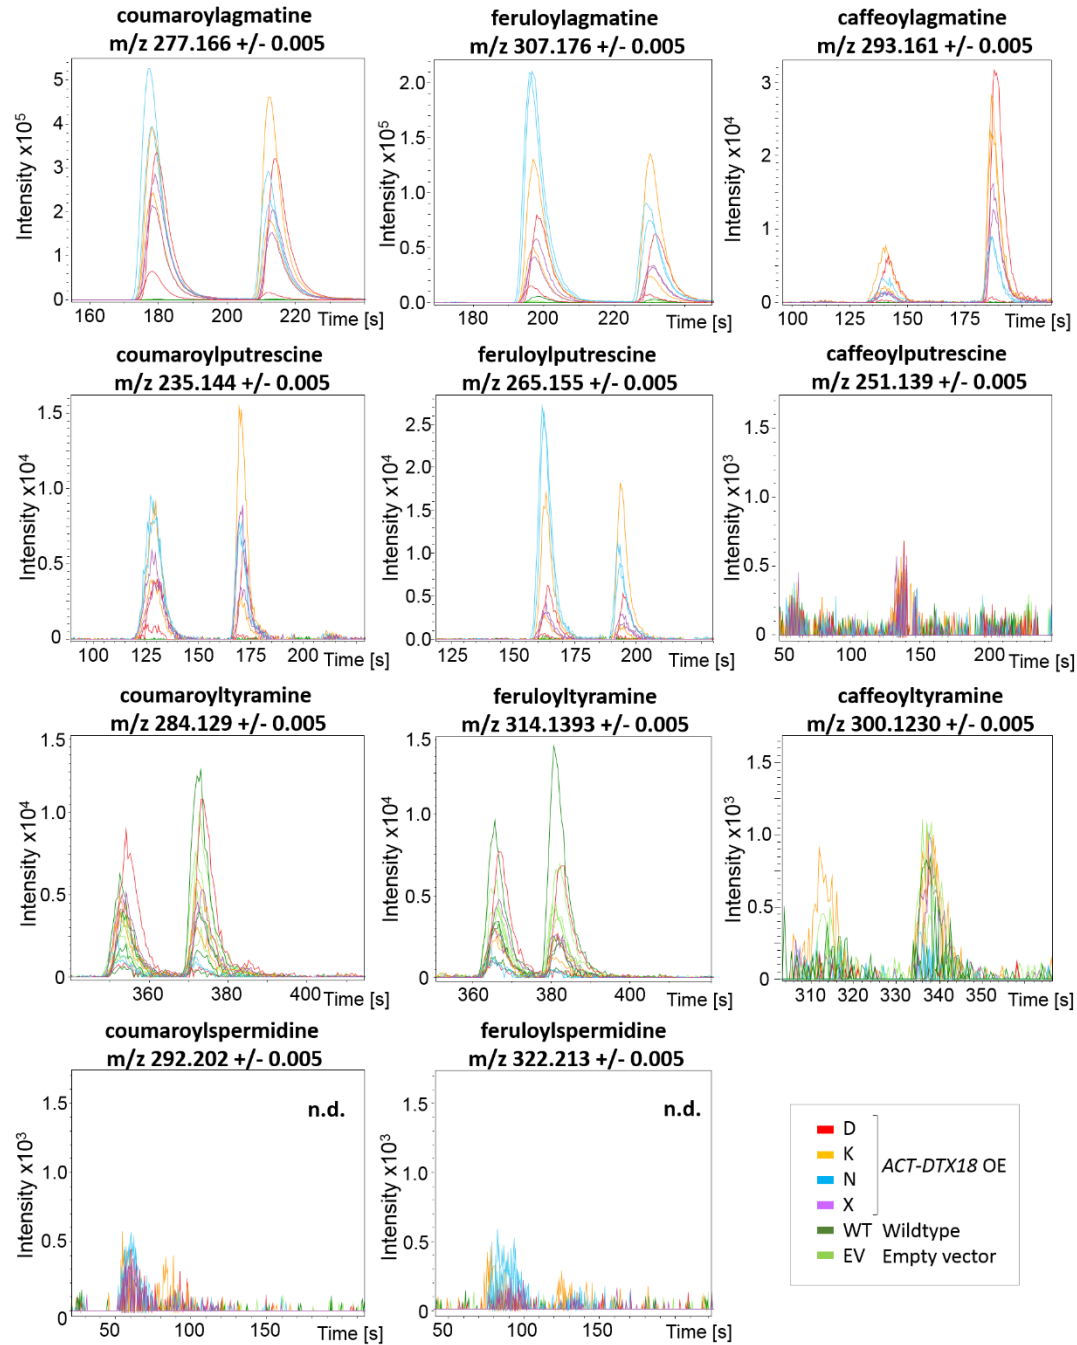

**Supplemental Figure 2** HPLC Chromatograms of Leaves and Droplets of Control and *ACT* and *ACT-DTX18*-Expressing Potato Plants.

**A,B,C,D:** Representative HPLC-MS total ion chromatograms of plant extracts of leaf disks or inoculum from control (wild-type and empty vector) and transgenic plants one day after infection by *P. infestans*. **A:** leaf disks of control and *ACT*-expressing potato plants (lines B, H, M, Z) **B:** inoculum of control and *ACT*-expressing potato plants (lines B, H, M, Z), **C:** leaf disks of control and *ACT-DTX18*-expressing plants (lines D, K, N, X), **D:** inoculum of control and *ACT-DTX18*-expressing plants (lines D, K, N, X). **E,F:** HPLC-MS extracted ion chromatograms of leaf disks (**E**) or inoculum (**F**) from *Phytophthora infestans*-infected *ACT-DTX18*-expressing potato plants, wild-type plants and empty vector controls. Two representative EICs are shown for each plant line.

A

| RT  | compound          | formula                                                       | m/z calc | m/z observed in MS | ppm mismatch | Collision energy [eV] | R                 | m/z fragments                                                                           |
|-----|-------------------|---------------------------------------------------------------|----------|--------------------|--------------|-----------------------|-------------------|-----------------------------------------------------------------------------------------|
| 178 | coumaroylagmatine | C <sub>14</sub> H <sub>20</sub> N <sub>4</sub> O <sub>2</sub> | 277.1659 | 277.1664           | 1.80         | 10; 20                | H                 | 147.043 (a); 218.118 (b); 260.137 (c); 114.103 (d); 131.128 (e); 119.0453 (f); 235.144  |
| 213 | coumaroylagmatine | C <sub>14</sub> H <sub>20</sub> N <sub>4</sub> O <sub>2</sub> | 277.1659 | 277.1664           | 1.80         | 10; 20                | H                 | 147.044 (a); 218.117 (b); 260.137(c); 114.102 (d); 119.0453 (f); 131.128 (e); 235.142   |
| 138 | caffeoylagmatine  | C <sub>14</sub> H <sub>20</sub> N <sub>4</sub> O <sub>3</sub> | 293.1608 | 293.1609           | 0.28         | 10 ; 20               | OH                | 163.0372 (a); 234.111 (b); 276.131 (c); 114.1022 (d); 131.127 (e) 135.0408 (f); 251.145 |
| 187 | caffeoylagmatine  | C <sub>14</sub> H <sub>20</sub> N <sub>4</sub> O <sub>3</sub> | 293.1608 | 293.161            | 0.62         | 10 ; 20               | OH                | 163.037 (a); 234.109 (b); 276.130 (c); 114.1022 (d); 131.129 (e)135.0408 (f); 251.145   |
| 197 | feruloylagmatine  | C <sub>15</sub> H <sub>22</sub> N <sub>4</sub> O <sub>3</sub> | 307.1765 | 307.1769           | 1.41         | 10; 20                | O-CH <sub>3</sub> | 177.053 (a); 248.125 (b); 290.147 (c); 114.080 (d); 131.128 (e); 149.0572 (f)           |
| 230 | feruloylagmatine  | C <sub>15</sub> H <sub>22</sub> N <sub>4</sub> O <sub>3</sub> | 307.1765 | 307.1767           | 0.76         | 10; 20                | O-CH <sub>3</sub> | 177.054 (a); 248.0245 (b); 290.152 (c); 114.1056 (d); 131.127 (e); 149.0573 (f)         |

- (a) coumaroyl- / caffeoyl- / feruloyl- core, neutral loss of agmatine  
 (b) neutral loss of agmatine head group  
 (c) neutral loss of NH<sub>3</sub>  
 (d) agmatine fragment  
 (e) agmatine  
 (f) coumaroyl- / caffeoyl- / feruloyl- core fragment

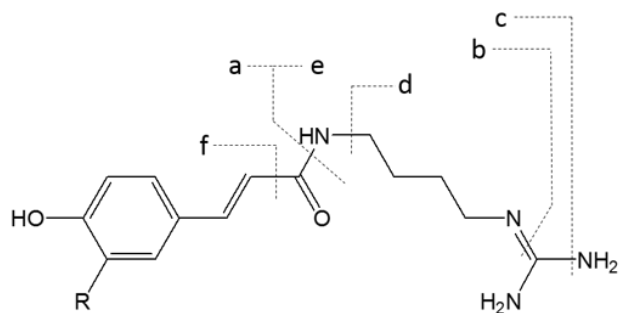

- 1) coumaroylagmatine: R = -H  
 2) caffeoylagmatine: R = -OH  
 3) feruloylagmatine: R = -O-CH<sub>3</sub>

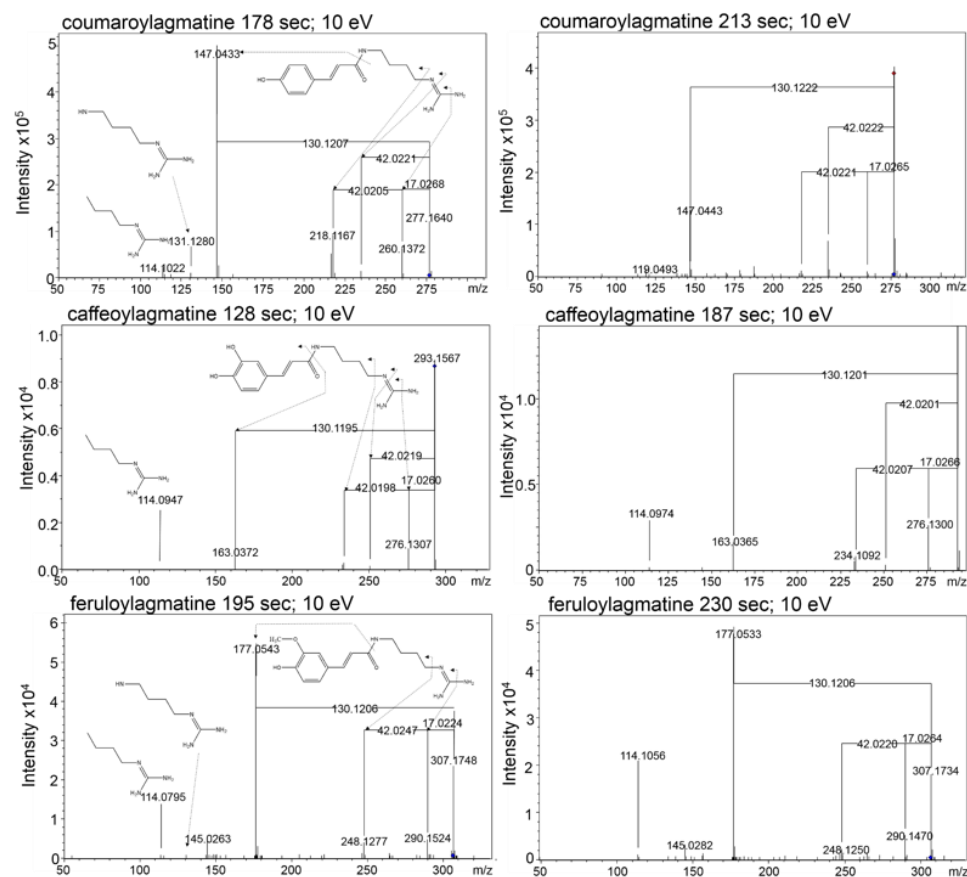



**B**

| RT  | compound            | formula                                                       | m/z calc | m/z observed in MS | ppm mismatch | Collision energy [eV] | R                 | m/z fragments                                      |
|-----|---------------------|---------------------------------------------------------------|----------|--------------------|--------------|-----------------------|-------------------|----------------------------------------------------|
| 128 | coumaroylputrescine | C <sub>13</sub> H <sub>18</sub> N <sub>2</sub> O <sub>2</sub> | 235.1441 | 235.1444           | 1.26         | 10 ; 20               | H                 | 147.044 (a); 218.118 (b); 119.049 (d)              |
| 170 | coumaroylputrescine | C <sub>13</sub> H <sub>18</sub> N <sub>2</sub> O <sub>2</sub> | 235.1441 | 235.1444           | 1.26         | 10 ; 20               | H                 | 147.044 (a); 218.118 (b); 119.049 (d)              |
| 119 | caffeoylputrescine  | C <sub>13</sub> H <sub>18</sub> N <sub>2</sub> O <sub>3</sub> | 251.1391 | 251.1393           | 1.12         | 10 ; 20               | OH                | 163.038 (a); 234.112 (b); 145.027 (c)              |
| 138 | caffeoylputrescine  | C <sub>13</sub> H <sub>18</sub> N <sub>2</sub> O <sub>3</sub> | 251.1391 | 251.1392           | 0.72         | 10 ; 20               | OH                | 163.038 (a); 234.116 (b); 145.026 (c)              |
| 163 | feruloylputrescine  | C <sub>14</sub> H <sub>20</sub> N <sub>2</sub> O <sub>3</sub> | 265.1547 | 265.155            | 1.25         | 10 ; 20               | O-CH <sub>3</sub> | 177.054 (a); 248.127 (b); 149.057 (d); 145.026 (c) |
| 193 | feruloylputrescine  | C <sub>14</sub> H <sub>20</sub> N <sub>2</sub> O <sub>3</sub> | 265.1547 | 265.155            | 1.25         | 10 ; 20               | O-CH <sub>3</sub> | 177.054 (a); 248.127 (b); 149.058 (d); 145.026 (c) |

- a) coumaroyl- / caffeoyl- / feruloyl- core, neutral loss of putrescine  
 (b) neutral loss of NH<sub>3</sub>  
 (c) neutral loss of H<sub>2</sub>O from coumaroyl-core  
 (d) neutral loss of carboxyl group from HCA core

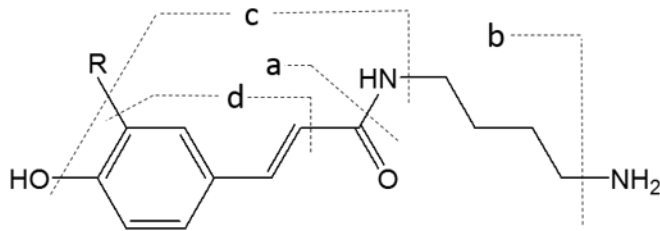

- 1) coumaroylputrescine: R = -H  
 2) caffeoylputrescine: R = -OH  
 3) feruloylputrescine: R = -O-CH<sub>3</sub>

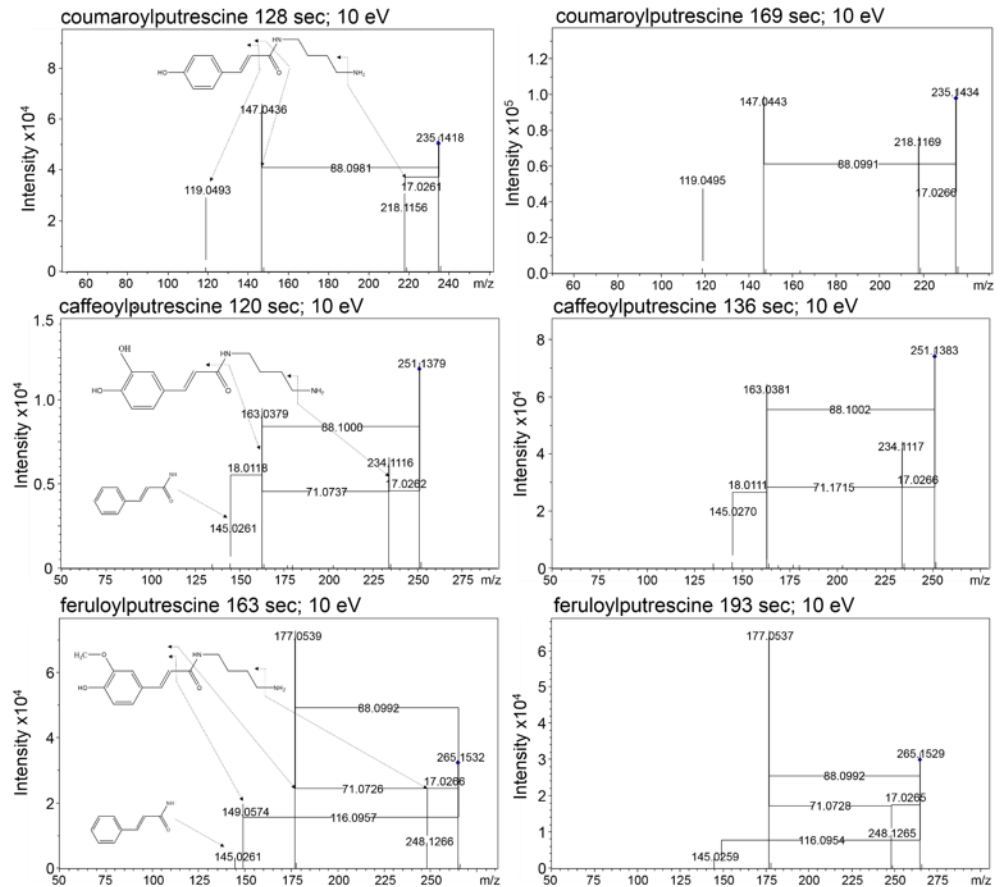

C

| RT  | compound            | formula                                                       | m/z calc | m/z observed in MS | ppm mismatch | Collision energy [eV] | R                 | m/z fragments                                                                |
|-----|---------------------|---------------------------------------------------------------|----------|--------------------|--------------|-----------------------|-------------------|------------------------------------------------------------------------------|
| 60  | coumaroylspermidine | C <sub>16</sub> H <sub>25</sub> N <sub>3</sub> O <sub>2</sub> | 292.2020 | 292.2024           | 1.53         | 10 ; 20               | H                 | 147.042 (a); 204.101 (b); 221.127 (c); 275.173 (d); 119.042 (e); 129.136 (f) |
| 93  | coumaroylspermidine | C <sub>16</sub> H <sub>25</sub> N <sub>3</sub> O <sub>2</sub> | 292.2020 | 292.2025           | 1.87         | 10 ; 20               | H                 | 147.042 (a); 204.101 (b); 221.127 (c); 275.173 (d); 129.136 (f)              |
| 87  | feruloylspermidine  | C <sub>17</sub> H <sub>27</sub> N <sub>3</sub> O <sub>3</sub> | 322.2125 | 322.2131           | 1.81         | 10 ; 20               | O-CH <sub>3</sub> | 177.053 (a); 234.111 (b); 251.136 (c); 305.182 (d); 129.137 (f)              |
| 135 | feruloylspermidine  | C <sub>17</sub> H <sub>27</sub> N <sub>3</sub> O <sub>3</sub> | 322.2125 | 322.2130           | 1.50         | 10 ; 20               | O-CH <sub>3</sub> | 177.053 (a); 234.111 (b); 251.137 (c); 305.182 (d) 129.137 (f)               |

- (a) coumaroyl- / feruloyl- core, neutral loss of spermidine
- (b) neutral loss of putrescine
- (c) neutral loss of putrescine (-NH)
- (d) neutral loss of NH<sub>3</sub>
- (e) neutral loss of carboxy from HCA core
- (f) spermidine fragment

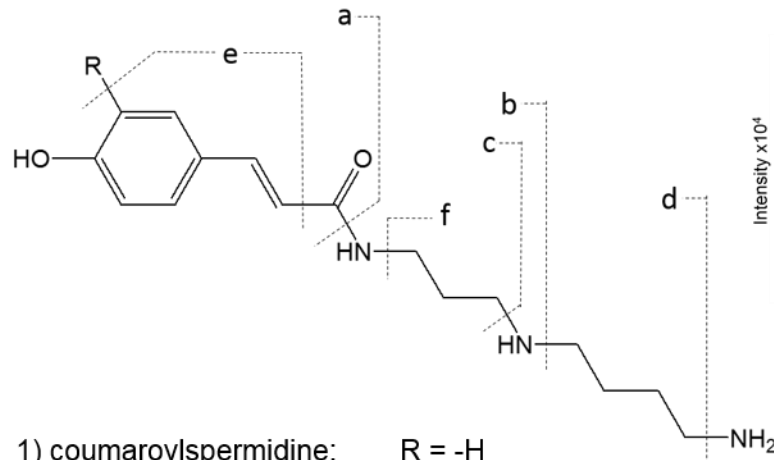

- 1) coumaroylspermidine: R = -H
- 2) feruloylspermidine: R = -O-CH<sub>3</sub>

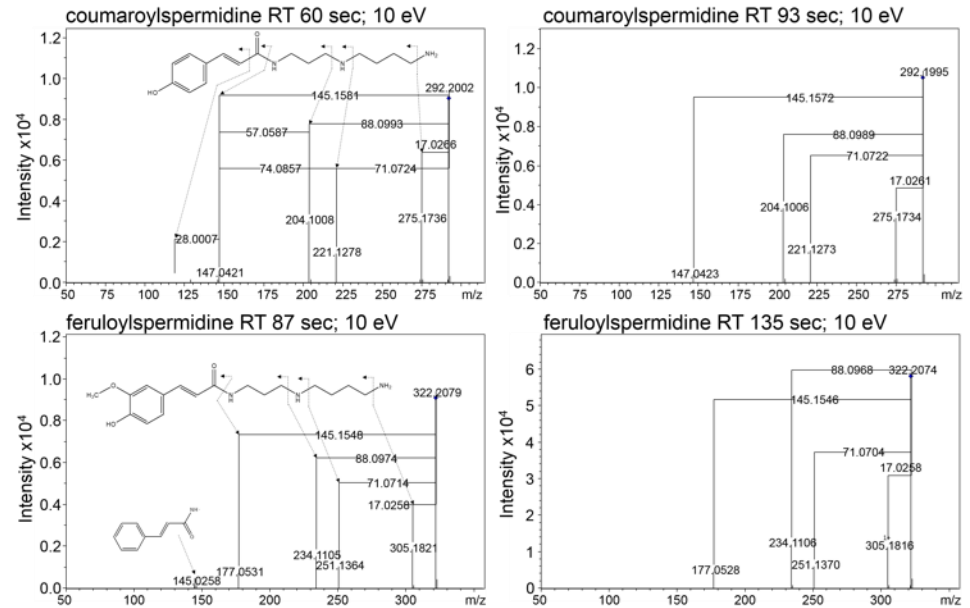

| RT  | compound          | formula                                         | m/z calc | m/z observed in MS | ppm mismatch | Collision energy [eV] | R                 | m/z fragments                                      |
|-----|-------------------|-------------------------------------------------|----------|--------------------|--------------|-----------------------|-------------------|----------------------------------------------------|
| 373 | coumaroyltyramine | C <sub>17</sub> H <sub>17</sub> NO <sub>3</sub> | 284.1281 | 284.1285           | 1.34         | 10 ; 20               | H                 | 147.042 (a); 119.045 (b); 121.062 (c); 164.073 (d) |
| 338 | caffeoyltyramine  | C <sub>17</sub> H <sub>17</sub> NO <sub>4</sub> | 300.1230 | 300.1232           | 0.67         | 10 ; 20               | OH                | 163.041 (a); 147.044 (a-R);                        |
| 382 | feruloyltyramine  | C <sub>18</sub> H <sub>19</sub> NO <sub>4</sub> | 314.1387 | 314.1391           | 1.32         | 10 ; 20               | O-CH <sub>3</sub> | 177.053 (a); 149.060 (b); 121.060 (c)              |

(a) coumaroyl- / feruloyl- core, neutral loss of tyramine  
 (b) decarboxylated coumaroyl- / feruloyl- core  
 (c) tyramine fragment; (d) tyramine + carboxyl group

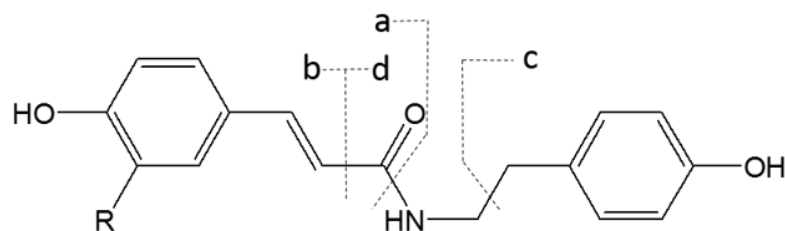

- 1) coumaroyltyramine: R = -H  
 2) caffeoyltyramine: R = -OH  
 3) feruloyltyramine: R = -O-CH<sub>3</sub>

**Supplemental Figure 3.** MSMS of Hydroxyl Cinnamic Acid Derivatives. Candidate precursor ions of HCAAs (**A**: agmatine, **B**: putrescine, **C**: spermidine, **D**: tyramine conjugates) were selected based on their accurate m/z obtained in LC-MS metabolite profiling measurements. MSMS was performed on plant extracts from *ACT-DTX18*-expressing lines. Precursor ions were isolated at the respective retention times and fragmented by CID with nitrogen as collision gas and 10 and 20 eV collision energy. Neutral losses and fragment ions were annotated to structures of HCAAs as indicated in the MSMS.

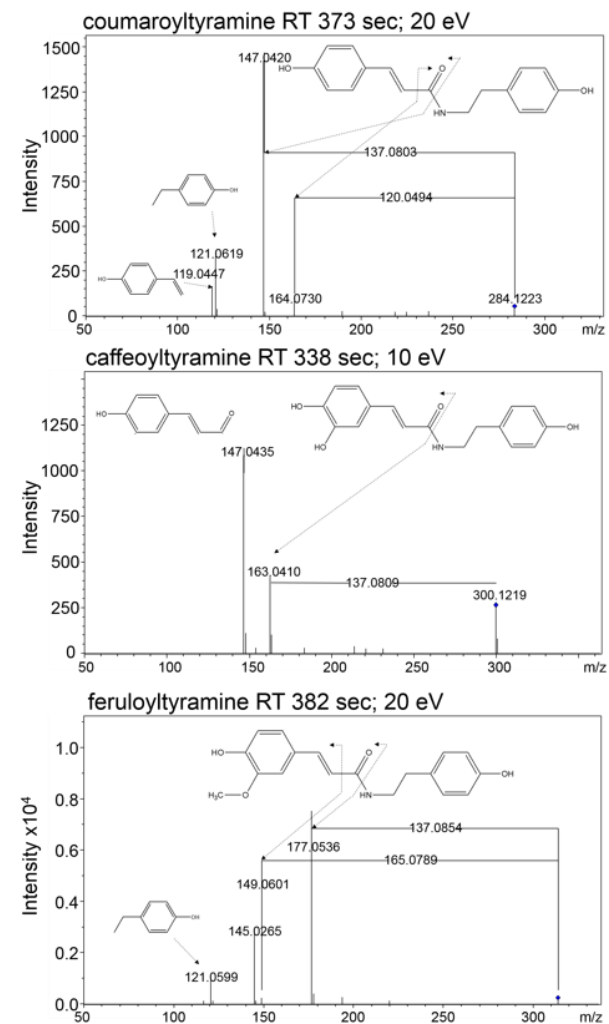

Supplement: supp_tpc.15.00706_TPC2015-00706-RAR2_Supplemental_Data.pdf [file supp_tpc.15.00706_TPC2015-00706-RAR2_Supplemental_Data.pdf]
